# Supplementary material for: An unbiased confirmation of the participating isomers of C2B5− in the formation of its photo-detachment spectra: a theoretical study
Source: Royal Society of Chemistry journal article supplement (doi:10.1039/d0cp04619a), 2020-12-10
Supplement: d0cp04619a1.pdf [file d0cp04619a1.pdf]

## Supporting Information for

# An unbiased confirmation of the participating isomers of $C_2B_5^-$ in the formation of its photo-detachment spectra, a theoretical study

Abhishek Kumar<sup>1</sup>, T. Rajagopala Rao<sup>1†</sup> and Rudraditya Sarkar<sup>2\*</sup>

<sup>1</sup> *Department of Chemistry, Indian Institute of Technology,*

*Patna, Bihta, Bihar, 801103, India and*

<sup>2</sup> *CEISAM Lab, UMR 6230, University of Nantes, F-44000 Nantes, France\**

---

\* rudra.smgr@gmail.com; Rudraditya.Sarkar@univ-nantes.fr; †rajgopal@iitp.ac.in

TABLE S1: Bond length( $\text{\AA}$ ) at the equilibrium ground state configuration of  $\text{C}_2\text{B}_5^-$  and  $\text{C}_2\text{B}_5$  (isomer-I) belongs to  $\text{C}_{2v}$  point group symmetry. The geometry optimization is performed with Møller-Plesset perturbation (MP2) level of theory employing Dunning's correlation consistent polarized valence triple-zeta (cc-pVTZ) basis set. The schematic numbering of the atoms are shown in Fig. 1(a) in the main manuscript.

| Bond length | $\text{C}_2\text{B}_5^-$ | $\text{C}_2\text{B}_5$ |
|-------------|--------------------------|------------------------|
| $C_1 - B_6$ | 1.4398                   | 1.3902                 |
| $C_1 - B_4$ | 1.5026                   | 1.4447                 |
| $B_6 - B_4$ | 1.6793                   | 1.7499                 |
| $B_4 - B_5$ | 1.5934                   | 1.5745                 |
| $B_4 - B_3$ | 1.6204                   | 1.6266                 |
| $B_5 - B_7$ | 1.6793                   | 1.7499                 |
| $B_5 - C_2$ | 1.5026                   | 1.4447                 |
| $c_2 - B_7$ | 1.4398                   | 1.3902                 |
| $B_5 - B_3$ | 1.9346                   | 2.1918                 |

TABLE S2: Bond length( $\text{\AA}$ ) at the equilibrium ground state configuration of  $\text{C}_2\text{B}_5^-$  and  $\text{C}_2\text{B}_5$  (isomer-II) belongs to  $\text{C}_s$  point group symmetry. The geometry optimization is performed with Møller-Plesset perturbation (MP2) level of theory employing Dunning's correlation consistent polarized valence triple-zeta (cc-pVTZ) basis set. The schematic numbering of the atoms are shown in Fig. 1(b) in the main manuscript.

| Bond length | $\text{C}_2\text{B}_5^-$ | $\text{C}_2\text{B}_5$ |
|-------------|--------------------------|------------------------|
| $B_7 - C_1$ | 1.4555                   | 1.4263                 |
| $B_7 - B_4$ | 1.6853                   | 1.6773                 |
| $C_1 - B_4$ | 1.5692                   | 1.5956                 |
| $C_1 - B_3$ | 1.4571                   | 1.4249                 |
| $B_4 - B_5$ | 1.6388                   | 1.6266                 |
| $B_4 - B_3$ | 1.8306                   | 1.7762                 |
| $B_5 - B_3$ | 1.9362                   | 2.2686                 |
| $C_5 - B_6$ | 1.6747                   | 1.6795                 |
| $B_3 - B_6$ | 1.6009                   | 1.6234                 |
| $B_5 - C_2$ | 1.4811                   | 1.4468                 |
| $C_2 - B_6$ | 1.4371                   | 1.4284                 |

TABLE S3: Frequencies (in eV) of both the isomers of  $C_2B_5^-$  and  $C_2B_5$  in their ground state equilibrium geometries.

| $C_{2v}$         |                     |                                   | $C_s$            |                     |                                    |
|------------------|---------------------|-----------------------------------|------------------|---------------------|------------------------------------|
| Vibrational mode | Anionic frequencies | Neutral frequencies<br>(Isomer-I) | Vibrational mode | Anionic frequencies | Neutral frequencies<br>(Isomer-II) |
| $\nu_1(a_1)$     | 0.0496              | 0.0494                            | $\nu_1(a')$      | 0.0417              | 0.0529                             |
| $\nu_2(a_1)$     | 0.0656              | 0.0715                            | $\nu_2(a')$      | 0.0573              | 0.0687                             |
| $\nu_3(a_1)$     | 0.0835              | 0.0803                            | $\nu_3(a')$      | 0.0651              | 0.0681                             |
| $\nu_4(a_1)$     | 0.1068              | 0.1112                            | $\nu_4(a')$      | 0.0786              | 0.0877                             |
| $\nu_5(a_1)$     | 0.1613              | 0.1641                            | $\nu_5(a')$      | 0.0950              | 0.1074                             |
| $\nu_6(a_1)$     | 0.1770              | 0.1732                            | $\nu_6(a')$      | 0.1087              | 0.1091                             |
| $\nu_7(b_1)$     | 0.0226              | 0.0368                            | $\nu_7(a')$      | 0.118               | 0.1233                             |
| $\nu_8(b_1)$     | 0.0570              | 0.0588                            | $\nu_8(a')$      | 0.1461              | 0.1540                             |
| $\nu_9(b_2)$     | 0.0358              | 0.0511                            | $\nu_9(a')$      | 0.1572              | 0.1603                             |
| $\nu_{10}(b_2)$  | 0.1010              | 0.0965                            | $\nu_{10}(a')$   | 0.1728              | 0.1694                             |
| $\nu_{11}(b_2)$  | 0.1218              | 0.1224                            | $\nu_{11}(a')$   | 0.1866              | 0.1866                             |
| $\nu_{12}(b_2)$  | 0.1478              | 0.1518                            | $\nu_{12}(a'')$  | 0.0217              | 0.0356                             |
| $\nu_{13}(b_2)$  | 0.1667              | 0.1724                            | $\nu_{13}(a'')$  | 0.0323              | 0.0384                             |
| $\nu_{14}(a_2)$  | 0.0325              | 0.0327                            | $\nu_{14}(a'')$  | 0.0566              | 0.0570                             |
| $\nu_{15}(a_2)$  | 0.0618              | 0.0615                            | $\nu_{15}(a'')$  | 0.0626              | 0.06242                            |

TABLE S4: The vertical detachment energies (in eV) of the electronic states of isomer-I and isomer-II using different active spaces employing CASSCF and MRCI level of theories.

| Isomer-I (CASSCF/cc-pVTZ)  |                  |                  |                  |                  |                  |
|----------------------------|------------------|------------------|------------------|------------------|------------------|
| Active space               | $\tilde{X}^2A_1$ | $\tilde{A}^2B_2$ | $\tilde{B}^2A_2$ | $\tilde{C}^2B_1$ | $\tilde{D}^2A_1$ |
| (10e,10o)                  | 2.7775           | 3.9480           | 4.6621           | 5.1380           | 6.0722           |
| (12e,10o)                  | 2.3309           | 3.8251           | 3.8897           | 4.3261           | 5.4038           |
| (10e,11o)                  | 2.7443           | 4.3175           | 4.6352           | 4.8294           | 6.0855           |
| (12e,11o)                  | 2.4268           | 3.8719           | 3.9469           | 4.5451           | 5.4492           |
| (10e,12o)                  | 2.7880           | 4.2958           | 4.6525           | 4.9122           | 6.1513           |
| (12e,12o)                  | 2.3426           | 4.1629           | 3.9407           | 4.2637           | 5.4164           |
| Isomer-I (MRCI/cc-pVTZ)    |                  |                  |                  |                  |                  |
| (10e,10o)                  | 3.2629           | 4.6906           | 5.1368           | 6.4018           | 6.5483           |
| (12e,10o)                  | 3.0552           | 4.5709           | 4.6840           | 5.4735           | 5.9838           |
| (10e,11o)                  | 3.2650           | 4.7457           | 5.1188           | 5.8789           | 6.5375           |
| (12e,11o)                  | 3.0497           | 4.6980           | 4.5816           | 5.5954           | 5.9987           |
| (10e,12o)                  | 3.2755           | 4.7470           | 5.1212           | 5.8994           | 6.5491           |
| (12e,12o)                  | 3.0345           | 4.7594           | 4.5604           | 5.4406           | 5.9718           |
| Isomer-II (CASSCF/cc-pVTZ) |                  |                  |                  |                  |                  |
| Active space               | $\tilde{X}^2A'$  | $\tilde{A}^2A''$ | $\tilde{B}^2A'$  | $\tilde{C}^2A'$  | $\tilde{D}^2A'$  |
| (10e,10o)                  | 1.8395           | 3.5691           | 4.6525           | 5.2653           | 5.3492           |
| (12e,10o)                  | 1.6692           | 3.3517           | 4.3310           | 5.1361           | 5.2208           |
| (10e,11o)                  | 1.8859           | 3.5948           | 4.6132           | 5.3125           | 5.3581           |
| (10e,12o)                  | 1.9290           | 3.6557           | 4.6163           | 5.2617           | 5.3764           |
| Isomer-II (MRCI/cc-pVTZ)   |                  |                  |                  |                  |                  |
| (10e,10o)                  | 2.4782           | 4.1752           | 5.3736           | 5.3916           | 5.7219           |
| (12e,10o)                  | 2.4045           | 4.1477           | 4.9871           | 5.8542           | 5.8657           |

TABLE S5: Comparison of experimental [1] vertical detachment energies with calculated MRCI(12e,10o)/cc-pVTZ level of theory in the present study and TD-B3LYP, OVGF and CCSD(T) level theories performed in the Ref. [1]. Here, (11) represents the electronic state of isomer-I ( $C_{2v}$ ) and (12) represents the electronic state of isomer-II ( $C_s$ ).

| States        | Ref. [1] | This study           | Ref. [1]  |      |         |
|---------------|----------|----------------------|-----------|------|---------|
| in Ref. [1]   | exp      | MRCI/cc-pVTZ         | TD-B3LYP  | OVGF | CCSD(T) |
| X( $C_s$ )    | 2.61     | 2.40 (12)            | 2.54 (12) | 2.74 | 2.63    |
| A( $C_{2v}$ ) | 2.95     | 3.05 (11)            | 3.00 (11) | 3.08 | 3.13    |
| B( $C_s$ )    | 4.06     | 4.15 (12)            | 4.13 (12) | 4.47 | ...     |
| C( $C_{2v}$ ) | 4.36     | 4.57 (11)            | 4.42 (11) | 4.73 | 4.49    |
| D( $C_{2v}$ ) | 4.93     | 4.68 (11)            | 4.79 (11) | 4.90 | 4.97    |
| E( $C_s$ )    | 5.09     | 4.99 (12)            | 5.08 (12) | 5.30 | 5.42    |
| F( $C_s$ )    | 5.62     | 5.98 (11), 5.85 (12) | 5.57 (12) | 5.86 | ...     |
| G( $C_s$ )    | ~6       | 5.87 (12)            | ...       | ...  | ...     |

TABLE S6: The frequencies of the reference state of the isomer-I and the intra-state coupling parameters of all vibrational modes of the  $\widetilde{X}^2A_1$  state of isomer-I are given in this table. The parameters are given in eV unit.

| Vibrational mode     | Anionic frequency | $E_0$   | $\kappa (\frac{\kappa^2}{2\omega^2})$ | $\gamma$ | $\delta$ | $\epsilon$ | $\zeta$ |
|----------------------|-------------------|---------|---------------------------------------|----------|----------|------------|---------|
| $\nu_1$ ( $a_1$ )    | 0.0496            | 3.06188 | -0.10417 (2.2054)                     | -0.00029 | 0.00080  |            |         |
| $\nu_2$ ( $a_1$ )    | 0.0656            | 3.06312 | -0.03814 (0.1690)                     | 0.01228  |          |            |         |
| $\nu_3$ ( $a_1$ )    | 0.0835            | 3.06305 | 0.10549 (0.7966)                      | -0.00638 |          |            |         |
| $\nu_4$ ( $a_1$ )    | 0.1068            | 3.06050 | -0.12287 (0.6617)                     | 0.00903  |          |            |         |
| $\nu_5$ ( $a_1$ )    | 0.1613            | 3.06118 | 0.00413 (0.0003)                      | 0.00576  | -0.00062 | 0.00001    | 0.00001 |
| $\nu_6$ ( $a_1$ )    | 0.1770            | 3.06045 | -0.16019 (0.4095)                     | -0.00743 |          |            |         |
| $\nu_7$ ( $b_1$ )    | 0.0226            | 3.00458 |                                       | 0.03756  |          |            |         |
| $\nu_8$ ( $b_1$ )    | 0.0570            | 3.03779 |                                       | 0.00365  |          |            |         |
| $\nu_9$ ( $b_2$ )    | 0.0358            | 3.00768 |                                       | 0.03701  |          |            |         |
| $\nu_{10}$ ( $b_2$ ) | 0.1010            | 3.01318 |                                       | -0.00868 |          |            |         |
| $\nu_{11}$ ( $b_2$ ) | 0.1218            | 3.00902 |                                       | 0.00135  |          |            |         |
| $\nu_{12}$ ( $b_2$ ) | 0.1478            | 3.00810 |                                       | 0.00813  |          | -0.00005   |         |
| $\nu_{13}$ ( $b_2$ ) | 0.1667            | 3.00922 |                                       | 0.01154  |          |            |         |
| $\nu_{14}$ ( $a_2$ ) | 0.0325            | 3.02865 |                                       | 0.00043  |          | -0.00003   |         |
| $\nu_{15}$ ( $a_2$ ) | 0.0618            | 3.01258 |                                       | -0.00063 |          |            |         |

TABLE S7: The frequencies of the reference state of the isomer-I and the intra-state coupling parameters of all vibrational modes of the  $\tilde{A}^2B_2$  state of isomer-I are given in this table. The parameters are given in eV unit.

| Vibrational mode             | Anionic frequency | $E_0$   | $\kappa \left( \frac{\kappa^2}{2\omega^2} \right)$ | $\gamma$ | $\delta$ | $\epsilon$ | $\zeta$ |
|------------------------------|-------------------|---------|----------------------------------------------------|----------|----------|------------|---------|
| $\nu_1$ (a <sub>1</sub> )    | 0.0496            | 4.57193 | 0.07140 (1.0361)                                   | -0.00188 |          |            |         |
| $\nu_2$ (a <sub>1</sub> )    | 0.0656            | 4.57084 | 0.00358 (0.0015)                                   | 0.00083  | 0.00000  | -0.00001   |         |
| $\nu_3$ (a <sub>1</sub> )    | 0.0835            | 4.57124 | 0.08572 (0.5269)                                   | -0.00422 |          |            |         |
| $\nu_4$ (a <sub>1</sub> )    | 0.1068            | 4.57084 | -0.08476 (0.3149)                                  | -0.00591 |          |            |         |
| $\nu_5$ (a <sub>1</sub> )    | 0.1613            | 4.57253 | 0.04858 (0.0453)                                   | -0.00293 |          |            |         |
| $\nu_6$ (a <sub>1</sub> )    | 0.1770            | 4.46938 | 0.01613 (0.0042)                                   | -0.00493 | -0.00061 |            |         |
| $\nu_7$ (b <sub>1</sub> )    | 0.0226            | 4.98253 |                                                    | 0.07089  |          |            |         |
| $\nu_8$ (b <sub>1</sub> )    | 0.0570            | 5.48320 |                                                    | -0.02213 |          |            |         |
| $\nu_9$ (b <sub>2</sub> )    | 0.0358            | 4.54818 |                                                    | 0.00326  |          | -0.00004   |         |
| $\nu_{10}$ (b <sub>2</sub> ) | 0.1010            | 4.54113 |                                                    | 0.00408  |          | -0.00013   |         |
| $\nu_{11}$ (b <sub>2</sub> ) | 0.1218            | 4.54943 |                                                    | -0.00336 |          |            |         |
| $\nu_{12}$ (b <sub>2</sub> ) | 0.1478            | 4.54635 |                                                    | -0.00740 |          | 0.00005    |         |
| $\nu_{13}$ (b <sub>2</sub> ) | 0.1667            | 4.54637 |                                                    | 0.01386  |          | -0.00010   |         |
| $\nu_{14}$ (a <sub>2</sub> ) | 0.0325            | 4.54660 |                                                    | -0.00227 |          |            |         |
| $\nu_{15}$ (a <sub>2</sub> ) | 0.0618            | 4.53935 |                                                    | -0.00536 |          |            |         |



TABLE S8: The frequencies of the reference state of the isomer-I and the intra-state coupling parameters of all vibrational modes of the  $\tilde{B}^2A_2$  state of isomer-I are given in this table. The parameters are given in eV unit.

| Vibrational mode             | Anionic frequency | $E_0$   | $\kappa (\frac{\kappa^2}{2\omega^2})$ | $\gamma$ | $\delta$ | $\epsilon$ | $\zeta$ |
|------------------------------|-------------------|---------|---------------------------------------|----------|----------|------------|---------|
| $\nu_1$ (a <sub>1</sub> )    | 0.0496            | 4.68139 | -0.02469 (0.1238)                     | 0.00174  | 0.00030  |            |         |
| $\nu_2$ (a <sub>1</sub> )    | 0.0656            | 4.68322 | -0.01429 (0.0237)                     | -0.00868 |          |            |         |
| $\nu_3$ (a <sub>1</sub> )    | 0.0835            | 4.61263 | -0.00285 (0.0006)                     | 0.00115  |          |            |         |
| $\nu_4$ (a <sub>1</sub> )    | 0.1068            | 4.68458 | -0.05193 (0.1182)                     | -0.00053 |          |            |         |
| $\nu_5$ (a <sub>1</sub> )    | 0.1613            | 4.68435 | 0.00947 (0.0017)                      | 0.00522  |          |            |         |
| $\nu_6$ (a <sub>1</sub> )    | 0.1770            | 4.61329 | 0.19575 (0.6115)                      | 0.00827  |          |            |         |
| $\nu_7$ (b <sub>1</sub> )    | 0.0226            | 4.48692 |                                       | -0.02313 |          |            |         |
| $\nu_8$ (b <sub>1</sub> )    | 0.0570            | 4.55611 |                                       | -0.04836 |          | 0.00042    |         |
| $\nu_9$ (b <sub>2</sub> )    | 0.0358            | 4.74553 |                                       | -0.00145 |          |            |         |
| $\nu_{10}$ (b <sub>2</sub> ) | 0.1010            | 4.74652 |                                       | 0.00058  |          | -0.00005   |         |
| $\nu_{11}$ (b <sub>2</sub> ) | 0.1218            | -       |                                       | -        |          |            |         |
| $\nu_{12}$ (b <sub>2</sub> ) | 0.1478            | 4.74048 |                                       | -0.02582 |          |            |         |
| $\nu_{13}$ (b <sub>2</sub> ) | 0.1667            | 4.74681 |                                       | 0.01664  |          |            |         |
| $\nu_{14}$ (a <sub>2</sub> ) | 0.0325            | 4.73017 |                                       | -0.00753 |          |            |         |
| $\nu_{15}$ (a <sub>2</sub> ) | 0.0618            | 4.72736 |                                       | -0.01494 |          |            |         |

TABLE S9: The frequencies of the reference state of the isomer-I and the intra-state coupling parameters of all vibrational modes of the  $\tilde{C}^2B_1$  state of isomer-I are given in this table. The parameters are given in eV unit.

| Vibrational mode             | Anionic frequency | $E_0$   | $\kappa (\frac{\kappa^2}{2\omega^2})$ | $\gamma$ | $\delta$ | $\epsilon$ | $\zeta$ |
|------------------------------|-------------------|---------|---------------------------------------|----------|----------|------------|---------|
| $\nu_1$ (a <sub>1</sub> )    | 0.0496            | 4.91959 | -0.27967 (15.8963)                    | -0.03305 | 0.00383  |            |         |
| $\nu_2$ (a <sub>1</sub> )    | 0.0656            | 4.92512 | -0.07239 (0.6088)                     | 0.01776  |          |            |         |
| $\nu_3$ (a <sub>1</sub> )    | 0.0835            | 4.92384 | 0.12602 (1.1388)                      | -0.00866 |          |            |         |
| $\nu_4$ (a <sub>1</sub> )    | 0.1068            | 4.92244 | -0.22057 (2.1326)                     | 0.00725  |          |            |         |
| $\nu_5$ (a <sub>1</sub> )    | 0.1613            | 4.93629 | -0.10890 (0.2279)                     | -0.01484 | 0.00173  |            |         |
| $\nu_6$ (a <sub>1</sub> )    | 0.1770            | 4.92064 | -0.29784 (1.4157)                     | -0.01974 |          |            |         |
| $\nu_7$ (b <sub>1</sub> )    | 0.0226            | 4.67842 |                                       | 0.00392  |          |            |         |
| $\nu_8$ (b <sub>1</sub> )    | 0.0570            | 4.69083 |                                       | 0.04579  |          | -0.00041   |         |
| $\nu_9$ (b <sub>2</sub> )    | 0.0358            | 5.43417 |                                       | 0.05623  |          |            |         |
| $\nu_{10}$ (b <sub>2</sub> ) | 0.1010            | 5.39726 |                                       | 0.00126  |          | -0.00008   |         |
| $\nu_{11}$ (b <sub>2</sub> ) | 0.1218            | -       |                                       | -        |          |            |         |
| $\nu_{12}$ (b <sub>2</sub> ) | 0.1478            | 5.38979 |                                       | 0.00770  |          |            |         |
| $\nu_{13}$ (b <sub>2</sub> ) | 0.1667            | 5.42366 |                                       | -0.02289 |          | 0.00012    |         |
| $\nu_{14}$ (a <sub>2</sub> ) | 0.0325            | 5.32798 |                                       | 0.02151  |          | -0.00018   |         |
| $\nu_{15}$ (a <sub>2</sub> ) | 0.0618            | 5.35472 |                                       | -0.03118 |          |            |         |

TABLE S10: The frequencies of the reference state of the isomer-I and the intra-state coupling parameters of all vibrational modes of the  $\widetilde{D}^2A_1$  state of isomer-I are given in this table. The parameters are given in eV unit.

| Vibrational mode | Anionic frequency | $E_0$   | $\kappa \left( \frac{\kappa^2}{2\omega^2} \right)$ | $\gamma$ | $\delta$ | $\epsilon$ | $\zeta$ |
|------------------|-------------------|---------|----------------------------------------------------|----------|----------|------------|---------|
| $\nu_1 (a_1)$    | 0.0496            | 5.99131 | 0.06215 (0.7850)                                   | -0.01430 | -0.00061 | -0.00024   |         |
| $\nu_2 (a_1)$    | 0.0656            | 5.99127 | 0.00068 (0.0001)                                   | -0.00170 | -0.00004 | -0.00002   |         |
| $\nu_3 (a_1)$    | 0.0835            | 5.95735 | -0.01440 (0.0149)                                  | 0.00414  |          |            |         |
| $\nu_4 (a_1)$    | 0.1068            | 5.99029 | -0.09777 (0.4184)                                  | -0.00357 | 0.00173  | -0.00025   |         |
| $\nu_5 (a_1)$    | 0.1613            | 5.95146 | -0.02718 (0.0142)                                  | -0.01659 | -0.00062 |            |         |
| $\nu_6 (a_1)$    | 0.1770            | 5.95589 | -0.04725 (0.0356)                                  | 0.00791  |          |            |         |
| $\nu_7 (b_1)$    | 0.0226            | 5.95738 |                                                    | -0.00733 |          |            |         |
| $\nu_8 (b_1)$    | 0.0570            | 6.00420 |                                                    | -0.01256 |          |            |         |
| $\nu_9 (b_2)$    | 0.0358            | 5.98033 |                                                    | -0.03140 |          | 0.00026    |         |
| $\nu_{10} (b_2)$ | 0.1010            | 5.98680 |                                                    | -0.03837 |          |            |         |
| $\nu_{11} (b_2)$ | 0.1218            | 5.96342 |                                                    | -0.02255 |          |            |         |
| $\nu_{12} (b_2)$ | 0.1478            | 5.97492 |                                                    | 0.00459  |          | -0.00018   |         |
| $\nu_{13} (b_2)$ | 0.1667            | 5.98219 |                                                    | 0.00988  |          | -0.00013   |         |
| $\nu_{14} (a_2)$ | 0.0325            | 5.96838 |                                                    | -0.01627 |          |            |         |
| $\nu_{15} (a_2)$ | 0.0618            | 5.97780 |                                                    | -0.01030 |          |            |         |

TABLE S11: The frequencies of the reference state of the isomer-II and the intra-state coupling parameters of all vibrational modes of the  $\widetilde{X}^2A'$  state of isomer-II are given in this table. The parameters are given in eV unit.

| Vibrational mode | Anionic frequency | $E_0$   | $\kappa (\frac{\kappa^2}{2\omega^2})$ | $\gamma$ | $\delta$ | $\epsilon$ | $\zeta$ |
|------------------|-------------------|---------|---------------------------------------|----------|----------|------------|---------|
| $\nu_1 (a')$     | 0.0417            | 2.40715 | 0.07336 (1.5474)                      | 0.02557  |          |            |         |
| $\nu_2 (a')$     | 0.0573            | 2.41135 | 0.05040 (0.3868)                      | 0.02521  | 0.00034  |            |         |
| $\nu_3 (a')$     | 0.0651            | 2.40277 | 0.03913 (0.1806)                      | 0.00617  |          |            |         |
| $\nu_4 (a')$     | 0.0786            | 2.41027 | 0.12192 (1.2030)                      | 0.01945  |          |            |         |
| $\nu_5 (a')$     | 0.0950            | 2.40627 | 0.00681 (0.0026)                      | 0.02640  | -0.00000 | -0.00018   |         |
| $\nu_6 (a')$     | 0.1087            | 2.40677 | 0.07975 (0.2691)                      | 0.00075  |          |            |         |
| $\nu_7 (a')$     | 0.1180            | 2.40343 | 0.06185 (0.1374)                      | 0.01085  | -0.00057 |            |         |
| $\nu_8 (a')$     | 0.1461            | 2.40911 | -0.00754 (0.0013)                     | 0.01613  | 0.00033  |            |         |
| $\nu_9 (a')$     | 0.1572            | 2.40629 | 0.00751 (0.0011)                      | 0.00629  | 0.00005  |            |         |
| $\nu_{10} (a')$  | 0.1728            | 2.38190 | 0.14746 (0.3641)                      | -0.00669 |          |            |         |
| $\nu_{11} (a')$  | 0.1866            | 2.38235 | -0.00822 (0.0010)                     | -0.00041 |          |            |         |
| $\nu_{12} (a'')$ | 0.0217            | 2.39606 |                                       | 0.03680  |          |            |         |
| $\nu_{13} (a'')$ | 0.0323            | 2.39652 |                                       | 0.01328  |          |            |         |
| $\nu_{14} (a'')$ | 0.0566            | 2.39646 |                                       | 0.00088  |          |            |         |
| $\nu_{15} (a'')$ | 0.0626            | 2.39643 |                                       | -0.00035 |          | 0.00006    |         |

TABLE S12: The frequencies of the reference state of the isomer-II and the intra-state coupling parameters of all vibrational modes of the  $\tilde{A}^2A'$  state of isomer-II are given in this table. The parameters are given in eV unit.

| Vibrational mode | Anionic frequency | $E_0$   | $\kappa (\frac{\kappa^2}{2\omega^2})$ | $\gamma$ | $\delta$ | $\epsilon$ | $\zeta$ |
|------------------|-------------------|---------|---------------------------------------|----------|----------|------------|---------|
| $\nu_1 (a')$     | 0.0417            | 4.14209 | -0.05716 (0.9395)                     | -0.00869 | 0.00124  |            |         |
| $\nu_2 (a')$     | 0.0573            | 4.14423 | 0.02549 (0.0989)                      | -0.00382 | -0.00046 |            |         |
| $\nu_3 (a')$     | 0.0651            | 4.14622 | 0.03376 (0.1345)                      | 0.00205  | -0.00062 |            |         |
| $\nu_4 (a')$     | 0.0786            | 4.14523 | 0.05165 (0.2159)                      | -0.01654 |          |            |         |
| $\nu_5 (a')$     | 0.0950            | 4.14920 | -0.07084 (0.2780)                     | -0.01470 |          |            |         |
| $\nu_6 (a')$     | 0.1087            | 4.14832 | 0.10528 (0.4690)                      | 0.00691  |          |            |         |
| $\nu_7 (a')$     | 0.1180            | 4.15085 | 0.01313 (0.0062)                      | -0.00522 | 0.00046  |            |         |
| $\nu_8 (a')$     | 0.1461            | 4.14394 | 0.03920 (0.0360)                      | 0.00146  |          |            |         |
| $\nu_9 (a')$     | 0.1572            | 4.14754 | -0.00773 (0.0012)                     | 0.00065  | -0.00011 | -0.00007   |         |
| $\nu_{10} (a')$  | 0.1728            | 4.05981 | -0.01702 (0.0049)                     | 0.01422  |          |            |         |
| $\nu_{11} (a')$  | 0.1866            | 4.14067 | 0.09141 (0.1200)                      | 0.00016  | -0.00048 |            |         |
| $\nu_{12} (a'')$ | 0.0217            | 4.13940 |                                       | 0.00676  |          | -0.00014   |         |
| $\nu_{13} (a'')$ | 0.0323            | 4.13954 |                                       | -0.00513 |          |            |         |
| $\nu_{14} (a'')$ | 0.0566            | 4.13930 |                                       | -0.00948 |          |            |         |
| $\nu_{15} (a'')$ | 0.0626            | 4.13825 |                                       | -0.01525 |          |            |         |

TABLE S13: The frequencies of the reference state of the isomer-II and the intra-state coupling parameters of all vibrational modes of the  $\tilde{B}^2A''$  state of isomer-II are given in this table. The parameters are given in eV unit.

| Vibrational mode | Anionic frequency | $E_0$   | $\kappa (\frac{\kappa^2}{2\omega^2})$ | $\gamma$ | $\delta$ | $\epsilon$ | $\zeta$ |
|------------------|-------------------|---------|---------------------------------------|----------|----------|------------|---------|
| $\nu_1 (a')$     | 0.0417            | 4.98375 | -0.02939 (0.2484)                     | 0.00075  |          |            |         |
| $\nu_2 (a')$     | 0.0573            | 4.98600 | 0.04334 (0.2860)                      | -0.00539 |          |            |         |
| $\nu_3 (a')$     | 0.0651            | 4.98531 | 0.01458 (0.0251)                      | -0.00343 |          |            |         |
| $\nu_4 (a')$     | 0.0786            | 4.98718 | 0.03054 (0.0755)                      | -0.00221 | -0.00024 |            |         |
| $\nu_5 (a')$     | 0.0950            | 4.98789 | 0.05108 (0.1446)                      | -0.00023 |          |            |         |
| $\nu_6 (a')$     | 0.1087            | 4.98556 | 0.06558 (0.1820)                      | 0.00265  |          |            |         |
| $\nu_7 (a')$     | 0.1180            | 4.98571 | 0.02056 (0.0152)                      | 0.00372  | -0.00014 |            |         |
| $\nu_8 (a')$     | 0.1461            | 4.98664 | 0.02873 (0.0193)                      | -0.01919 | -0.00058 |            |         |
| $\nu_9 (a')$     | 0.1572            | 4.98832 | -0.02229 (0.0101)                     | 0.00499  |          |            |         |
| $\nu_{10} (a')$  | 0.1728            | 4.89533 | -0.22228 (0.8273)                     | 0.03666  | 0.00484  | -0.00116   |         |
| $\nu_{11} (a')$  | 0.1866            | 4.98294 | -0.05079 (0.0370)                     | 0.01380  |          |            |         |
| $\nu_{12} (a'')$ | 0.0217            | 4.96268 |                                       | -0.01743 |          |            |         |
| $\nu_{13} (a'')$ | 0.0323            | 4.96286 |                                       | -0.02045 |          |            |         |
| $\nu_{14} (a'')$ | 0.0566            | 4.96354 |                                       | -0.00670 |          |            |         |
| $\nu_{15} (a'')$ | 0.0626            | 4.96501 |                                       | -0.0055  |          | -0.00004   |         |

TABLE S14: The frequencies of the reference state of the isomer-II and the intra-state coupling parameters of all vibrational modes of the  $\tilde{C}^2A'$  state of isomer-II are given in this table. The parameters are given in eV unit.

| Vibrational mode | Anionic frequency | $E_0$   | $\kappa (\frac{\kappa^2}{2\omega^2})$ | $\gamma$ | $\delta$ | $\epsilon$ | $\zeta$  |
|------------------|-------------------|---------|---------------------------------------|----------|----------|------------|----------|
| $\nu_1 (a')$     | 0.0417            | 5.86834 | 0.02006 (0.1157)                      | -0.02626 | -0.00389 | 0.00020    | 0.00008  |
| $\nu_2 (a')$     | 0.0573            | 5.83498 | 0.12084 (2.2237)                      | -0.00261 |          |            |          |
| $\nu_3 (a')$     | 0.0651            | 5.84870 | 0.00464 (0.0025)                      | -0.02005 |          |            |          |
| $\nu_4 (a')$     | 0.0786            | 5.84787 | 0.19709 (3.1438)                      | 0.01567  |          |            |          |
| $\nu_5 (a')$     | 0.0950            | 5.86349 | 0.20971 (2.4365)                      | -0.01001 | -0.00341 |            |          |
| $\nu_6 (a')$     | 0.1087            | 5.85446 | 0.10746 (0.4887)                      | -0.00122 |          |            |          |
| $\nu_7 (a')$     | 0.1180            | 5.86186 | 0.04043 (0.0587)                      | -0.03827 |          |            |          |
| $\nu_8 (a')$     | 0.1461            | 5.80910 | 0.08025 (0.1509)                      | -0.06145 | -0.00078 | 0.00073    |          |
| $\nu_9 (a')$     | 0.1572            | 5.85783 | 0.10328 (0.2158)                      | -0.01033 |          |            |          |
| $\nu_{10} (a')$  | 0.1728            | 5.50398 | -0.02102 (0.0074)                     | -0.00686 | 0.00147  | 0.00036    | -0.00002 |
| $\nu_{11} (a')$  | 0.1866            | 5.83502 | 0.12921 (0.2397)                      | 0.03780  |          |            |          |
| $\nu_{12} (a'')$ | 0.0217            | 5.83970 |                                       | -0.01903 |          |            |          |
| $\nu_{13} (a'')$ | 0.0323            | 5.82847 |                                       | -0.06050 |          |            |          |
| $\nu_{14} (a'')$ | 0.0566            | 5.83239 |                                       | -0.02290 |          |            |          |
| $\nu_{15} (a'')$ | 0.0626            | 5.82989 |                                       | -0.05941 |          | 0.00048    |          |

TABLE S15: The frequencies of the reference state of the isomer-II and the intra-state coupling parameters of all vibrational modes of the  $\widetilde{D}^2A'$  state of isomer-II are given in this table. The parameters are given in eV unit.

| Vibrational mode | Anionic frequency | $E_0$   | $\kappa (\frac{\kappa^2}{2\omega^2})$ | $\gamma$ | $\delta$ | $\epsilon$ | $\zeta$ |
|------------------|-------------------|---------|---------------------------------------|----------|----------|------------|---------|
| $\nu_1 (a')$     | 0.0417            | 5.84476 | -0.14781 (6.2821)                     | -0.00634 |          |            |         |
| $\nu_2 (a')$     | 0.0573            | 5.85743 | -0.06260 (0.5968)                     | 0.00096  |          |            |         |
| $\nu_3 (a')$     | 0.0651            | 5.86409 | -0.00041 (0.0000)                     | -0.00742 | -0.00003 | 0.00012    |         |
| $\nu_4 (a')$     | 0.0786            | 5.86578 | -0.08176 (0.5410)                     | 0.00272  | 0.00173  |            |         |
| $\nu_5 (a')$     | 0.0950            | 5.85595 | -0.11115 (0.6838)                     | -0.01503 | 0.00160  | 0.00021    |         |
| $\nu_6 (a')$     | 0.1087            | 5.85741 | 0.06000 (0.1523)                      | 0.00513  | -0.00195 | -0.00047   |         |
| $\nu_7 (a')$     | 0.1180            | 5.86787 | 0.02627 (0.0248)                      | -0.01614 | 0.00023  |            |         |
| $\nu_8 (a')$     | 0.1461            | 5.88159 | 0.07971 (0.1488)                      | 0.01086  |          |            |         |
| $\nu_9 (a')$     | 0.1572            | 5.86506 | 0.01704 (0.0059)                      | -0.01452 | 0.00031  | 0.00014    |         |
| $\nu_{10} (a')$  | 0.1728            | 5.78806 | 0.06173 (0.0638)                      | 0.01800  | -0.00255 | -0.00036   |         |
| $\nu_{11} (a')$  | 0.1866            | 5.85423 | -0.05829 (0.0488)                     | -0.00388 |          |            |         |
| $\nu_{12} (a'')$ | 0.0217            | 5.84773 |                                       | 0.01936  |          |            |         |
| $\nu_{13} (a'')$ | 0.0323            | 5.85627 |                                       | -0.00161 |          | -0.00009   |         |
| $\nu_{14} (a'')$ | 0.0566            | 5.85580 |                                       | -0.01902 |          |            |         |
| $\nu_{15} (a'')$ | 0.0626            | 5.85598 |                                       | -0.01701 |          |            |         |



TABLE S16: The inter-state coupling between  $\tilde{X}^2A_1$ - $\tilde{A}^2B_2$  and  $\tilde{A}^2B_2$ - $\tilde{B}^2A_2$  states of isomer-I and the same between  $\tilde{A}^2A'$ - $\tilde{B}^2A''$  states of isomer-II are given in this table. The frequency of the coupling vibrational modes are also given in the table. All units are given in eV.

| Electronic states of isomer-I       |                   |                                         |         |
|-------------------------------------|-------------------|-----------------------------------------|---------|
| Vibrational mode                    | Anionic frequency | $\lambda (\frac{\lambda^2}{2\omega^2})$ | $\beta$ |
| $\tilde{X}^2A_1$ - $\tilde{A}^2B_2$ |                   |                                         |         |
| $\nu_{10}$                          | 0.1010            | 0.1651 (1.3360)                         | -0.0016 |
| $\tilde{A}^2B_2$ - $\tilde{B}^2A_2$ |                   |                                         |         |
| $\nu_7$                             | 0.0226            | 0.1204 (14.1908)                        | 0.0015  |
| $\nu_8$                             | 0.0570            | 0.0665 (0.6805)                         | -0.0009 |
| Electronic states of isomer-II      |                   |                                         |         |
| $\tilde{A}^2A'$ - $\tilde{B}^2A''$  |                   |                                         |         |
| $\nu_{14}$                          | 0.0566            | 0.0340 (0.1804)                         |         |
| $\nu_{15}$                          | 0.0626            | 0.0437 (0.2437)                         |         |

TABLE S17: The inter-state coupling between  $\tilde{A}^2B_2\text{-}\tilde{C}^2B_1$  and  $\tilde{B}^2A_2\text{-}\tilde{C}^2B_1$  electronic states of the isomer-I. The data are presented in eV.

| $\tilde{A}^2B_2\text{-}\tilde{C}^2B_1$ |           |                                 | $\tilde{B}^2A_2\text{-}\tilde{C}^2B_1$ |           |                                 |
|----------------------------------------|-----------|---------------------------------|----------------------------------------|-----------|---------------------------------|
| Vibrational                            | Anionic   | $\lambda$                       | Vibrational                            | Anionic   | $\lambda$                       |
| mode                                   | Frequency | $(\frac{\lambda^2}{2\omega^2})$ | mode                                   | Frequency | $(\frac{\lambda^2}{2\omega^2})$ |
| $\nu_{14}$                             | 0.0325    | 0.0634 (1.9027)                 | $\nu_9$                                | 0.0358    | 0.1031 (4.1468)                 |
|                                        |           |                                 | $\nu_{10}$                             | 0.1010    | 0.2117 (2.1966)                 |
|                                        |           |                                 | $\nu_{12}$                             | 0.1478    | 0.2178 (1.0857)                 |

TABLE S18: Normal modes combination, size of the primitive basis and single partition function (SPF) for the coupled and uncoupled full dimension and reduced dimension nuclear dynamics (time-dependent and time-independent) of  $C_2B_5$  using MCTDH [2] approach

| Combination of normal modes                                | Primitive basis     | SPF                  | Figure                         |
|------------------------------------------------------------|---------------------|----------------------|--------------------------------|
| $\nu_1$                                                    | 16                  | [10, 10, 10, 10, 10] | Fig. 4 (a,b)                   |
| $\nu_3, \nu_4, \nu_6$                                      | 12, 10, 10          | [8, 8, 8, 8, 8]      | Fig. S1                        |
| $\nu_2, \nu_5$                                             | 6, 6                | [4, 4, 4, 4, 4]      | Fig. S5 (a,b), black spectra   |
| $\nu_1, \nu_9, \nu_{10}$                                   | 16, 16, 14          | [10, 10, 10, 10]     | Fig. 5 (a-d)                   |
| $\nu_3, \nu_4, \nu_6, \nu_{12}, \nu_{14}$                  | 12, 10, 10, 10, 10  | [8, 8, 8, 8]         | Fig. 6 ( $C_{2v}$ )            |
| $\nu_2, \nu_5, \nu_7, \nu_8, \nu_{11}, \nu_{13}, \nu_{15}$ | 6, 6, 4, 8, 4, 4, 6 | [4, 4, 4, 4]         | Fig. S5 (a,b) [red spectra]    |
| $\nu_1, \nu_9, \nu_{10}$                                   | 16, 16, 14          | [10, 10, 10, 10, 10] |                                |
| $\nu_3, \nu_4, \nu_6, \nu_{12}, \nu_{14}$                  | 12, 10, 10, 10, 10  | [8, 8, 8, 8, 8]      | Fig. S4                        |
| $\nu_2, \nu_5, \nu_7, \nu_8, \nu_{11}, \nu_{13}, \nu_{15}$ | 6, 6, 4, 8, 4, 4, 6 | [4, 4, 4, 4, 4]      |                                |
| $\nu_1$                                                    | 11                  | [8, 8, 8, 8, 8]      | Fig. 4 (b, c)                  |
| $\nu_4$                                                    | 12                  | [9, 9, 9, 9, 9]      | Fig. S2                        |
| $\nu_2, \nu_3, \nu_5, \nu_6$                               | 8, 8, 8, 9          | [5, 5, 5, 5, 5]      | Fig. S3, green spectra         |
| $\nu_1, \nu_4, \nu_6$                                      | 18, 16, 12          | [10, 10, 10, 10, 10] | Fig. S3, red spectra           |
| $\nu_2, \nu_3, \nu_5$                                      | 10, 10, 10          | [8, 8, 8, 8, 8]      | Fig. S5 (c-f), black spectra   |
| $\nu_7, \nu_8, \nu_{11}$                                   | 8, 8, 8             | [6, 6, 6, 6, 6]      |                                |
| $\nu_9, \nu_{10}$                                          | 6, 6                | [4, 4, 4, 4, 4]      |                                |
| $\nu_1, \nu_4, \nu_6$                                      | 18, 16, 12          | [10, 10, 10, 10, 10] | Fig. 5 (e-f)                   |
| $\nu_2, \nu_3, \nu_5, \nu_{14}, \nu_{15}$                  | 10, 10, 10, 10, 10  | [8, 8, 8, 8, 8]      | Fig. 6 ( $C_s$ ), blue spectra |
| $\nu_7, \nu_8, \nu_{11}$                                   | 8, 8, 8             | [6, 6, 6, 6, 6]      | Fig. S5 (c-f), black spectra   |
| $\nu_9, \nu_{10}, \nu_{12}, \nu_{13}$                      | 6, 6, 4, 4          | [4, 4, 4, 4, 4]      |                                |

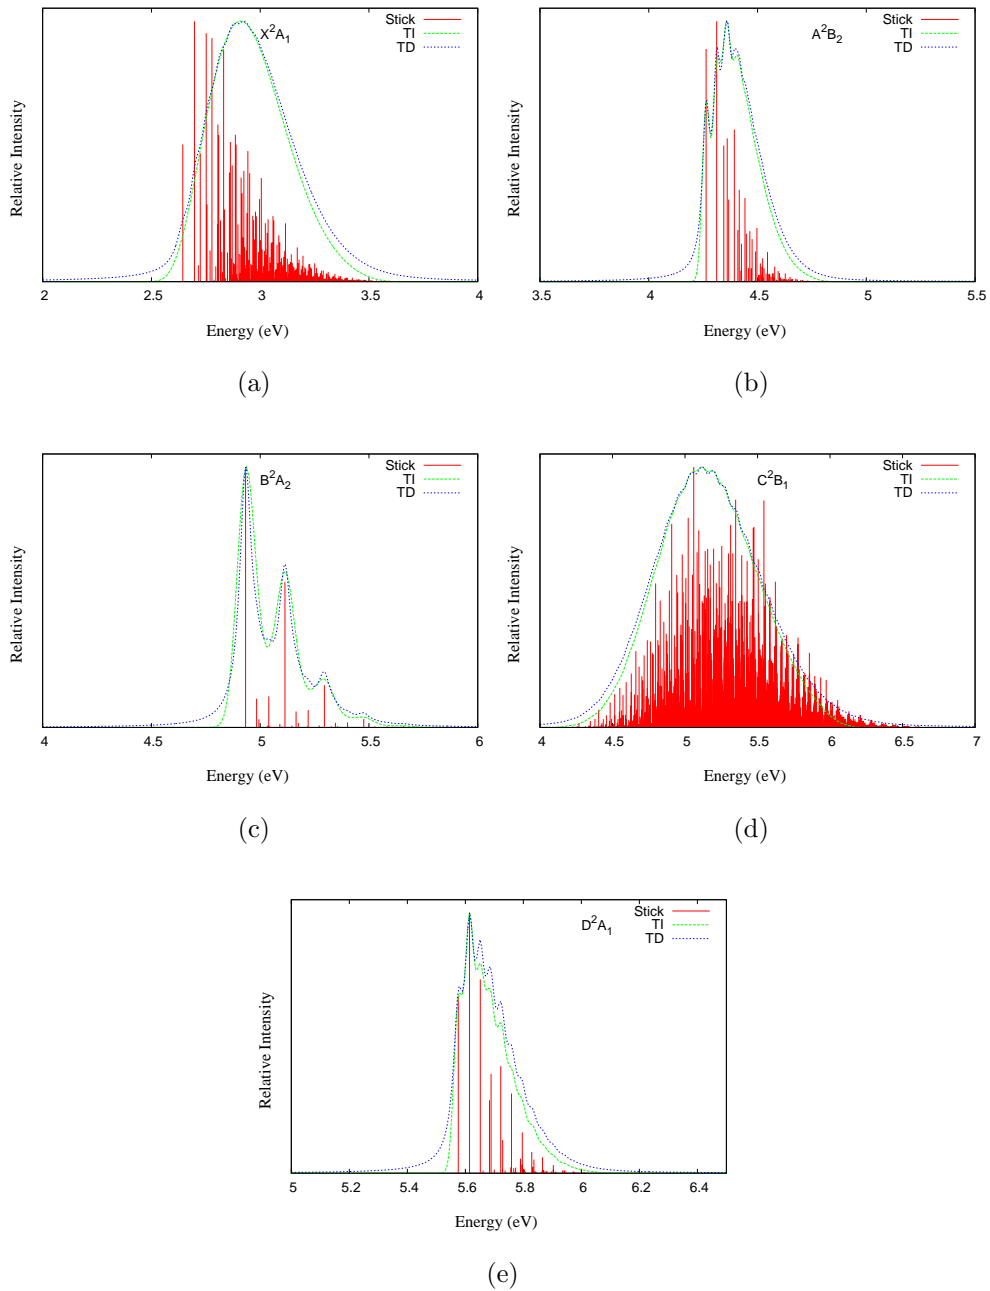

FIG. S1: The uncoupled time-dependent and time-independent spectra of the first five electronic states ( $\tilde{X}$  in panel a,  $\tilde{A}$  in panel b,  $\tilde{B}$  in panel c,  $\tilde{C}$  in panel d and  $\tilde{D}$  in panel e) of isomer-I are shown here. The vibronic energies obtained from the time-independent calculation are shown in red stick lines, while the spectrum envelope obtained from the convolution of these energies is shown in green dashed line and the spectrum envelope obtained from the time-dependent calculation is shown in blue dotted line in each panel.

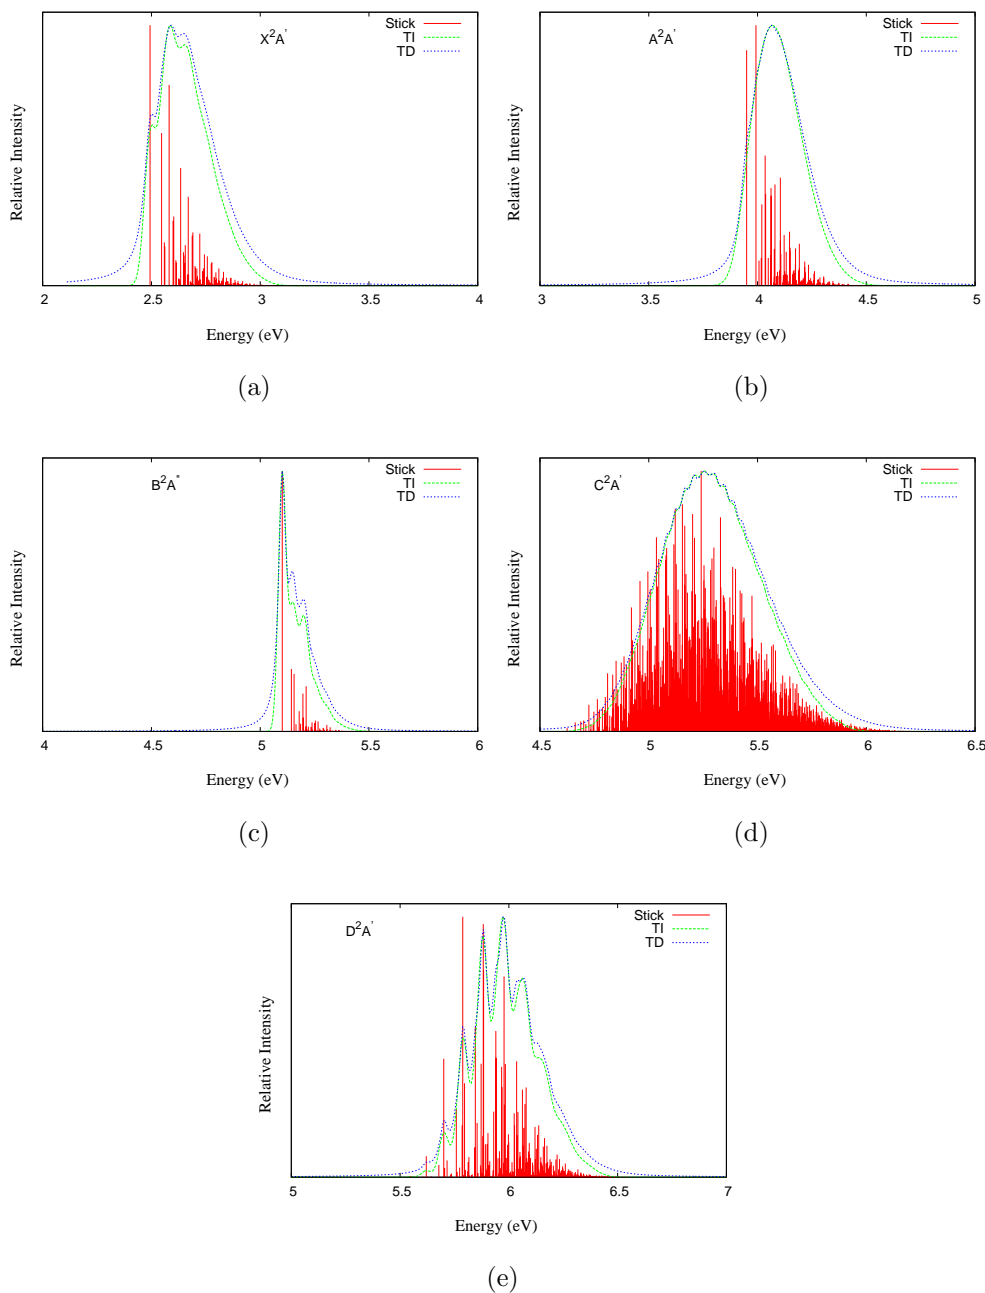

FIG. S2: The uncoupled time-dependent and time-independent spectra of the first five electronic states ( $\tilde{X}$  in panel a,  $\tilde{A}$  in panel b,  $\tilde{B}$  in panel c,  $\tilde{C}$  in panel d and  $\tilde{D}$  in panel e) of isomer-II are shown here. All calculations are performed including lowest six frequency totally symmetric vibrational modes ( $\nu_1$ - $\nu_6$ ). The vibronic energies obtained from time-independent calculation are shown in red stick lines, while the spectrum envelope obtained from the convolution of these energies is shown in green dashed line and the spectrum envelope obtained from the time-dependent calculation is shown in blue dotted

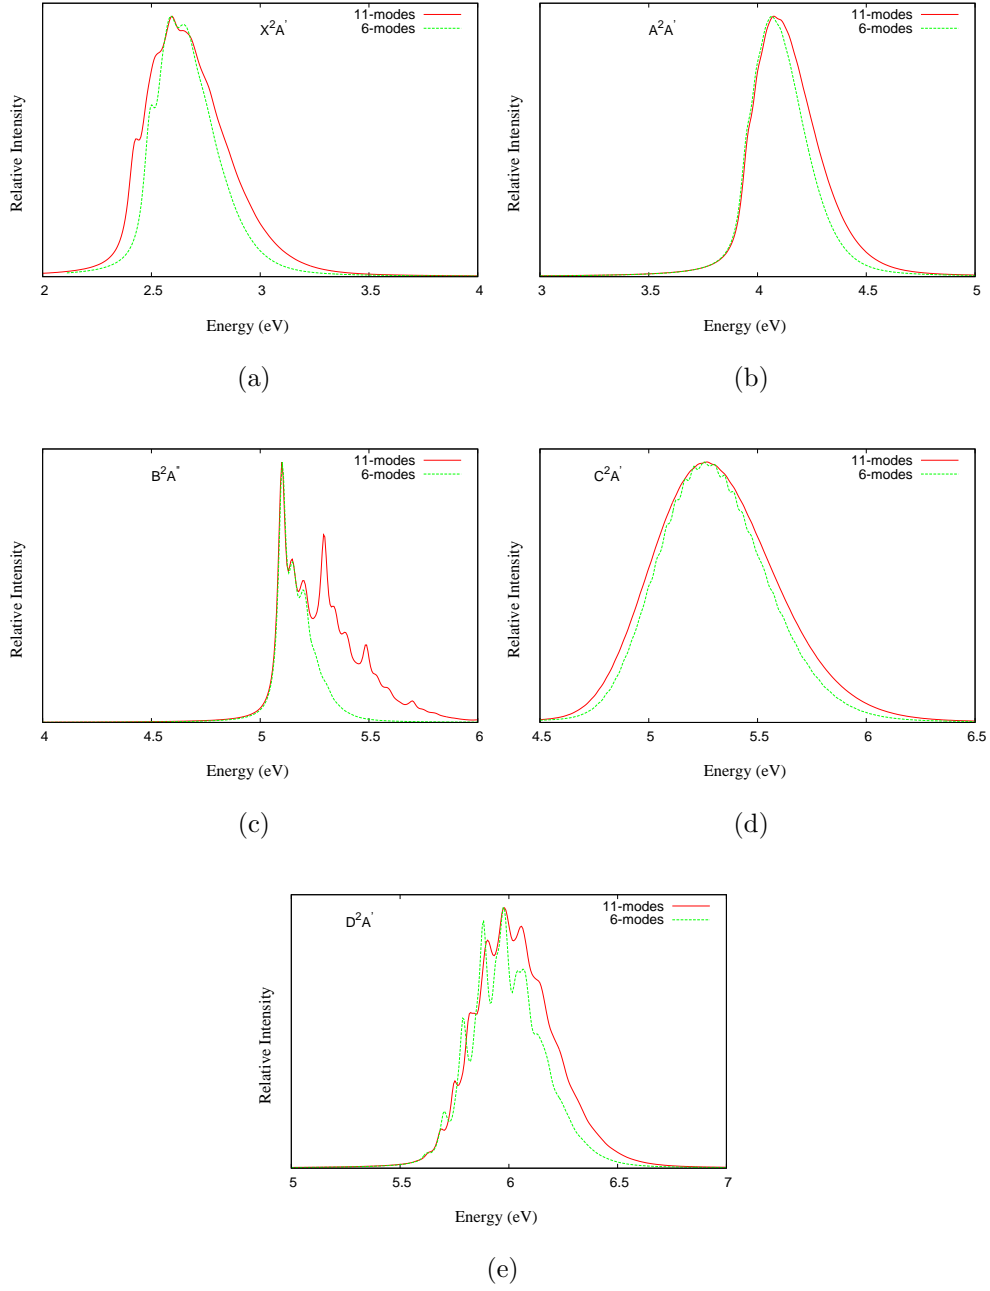

FIG. S3: The comparison between 6-modes and 11-modes uncoupled time-dependent calculations of the first five electronic states ( $\tilde{X}$  in panel a,  $\tilde{A}$  in panel b,  $\tilde{B}$  in panel c,  $\tilde{C}$  in panel d and  $\tilde{D}$  in panel e) of isomer-II is shown here.

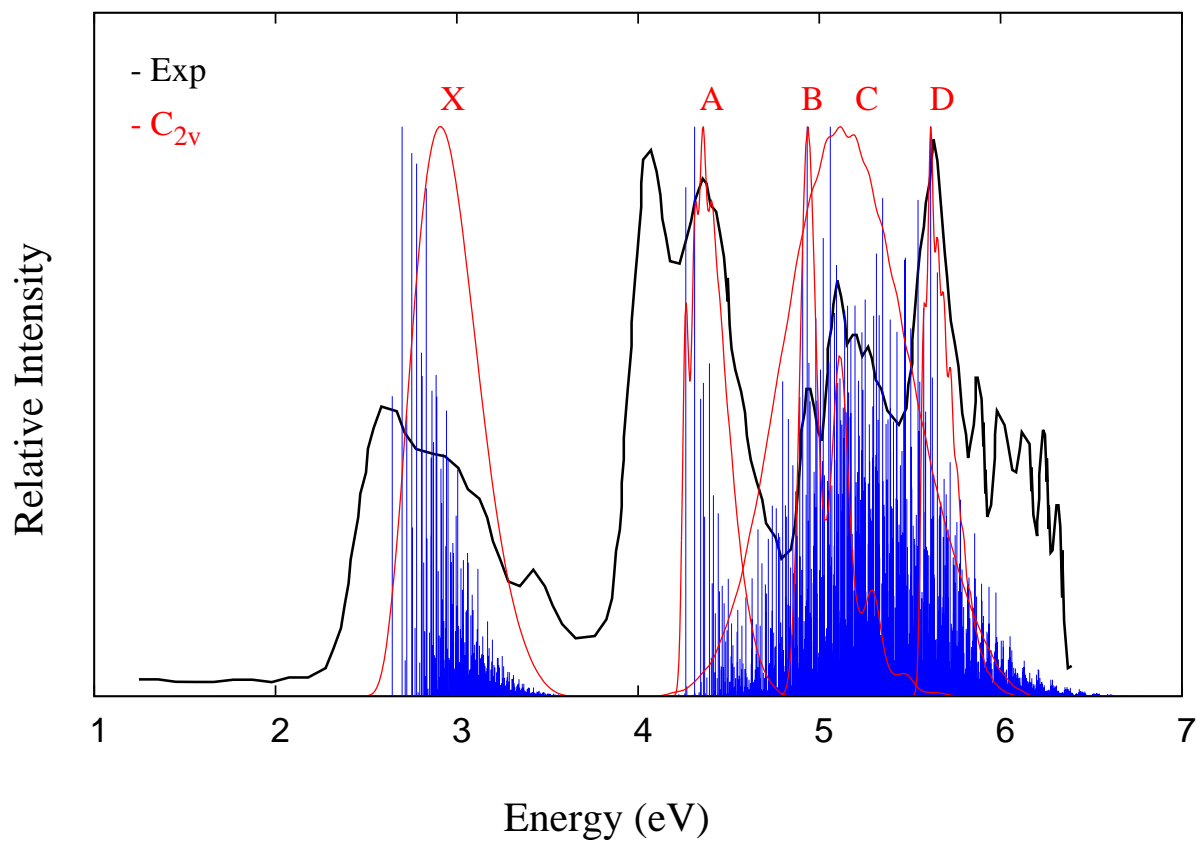

FIG. S4: Overall comparison of the five uncoupled state's spectra of isomer-I obtained from time-independent nuclear dynamics simulations with the available experimental recording [1].

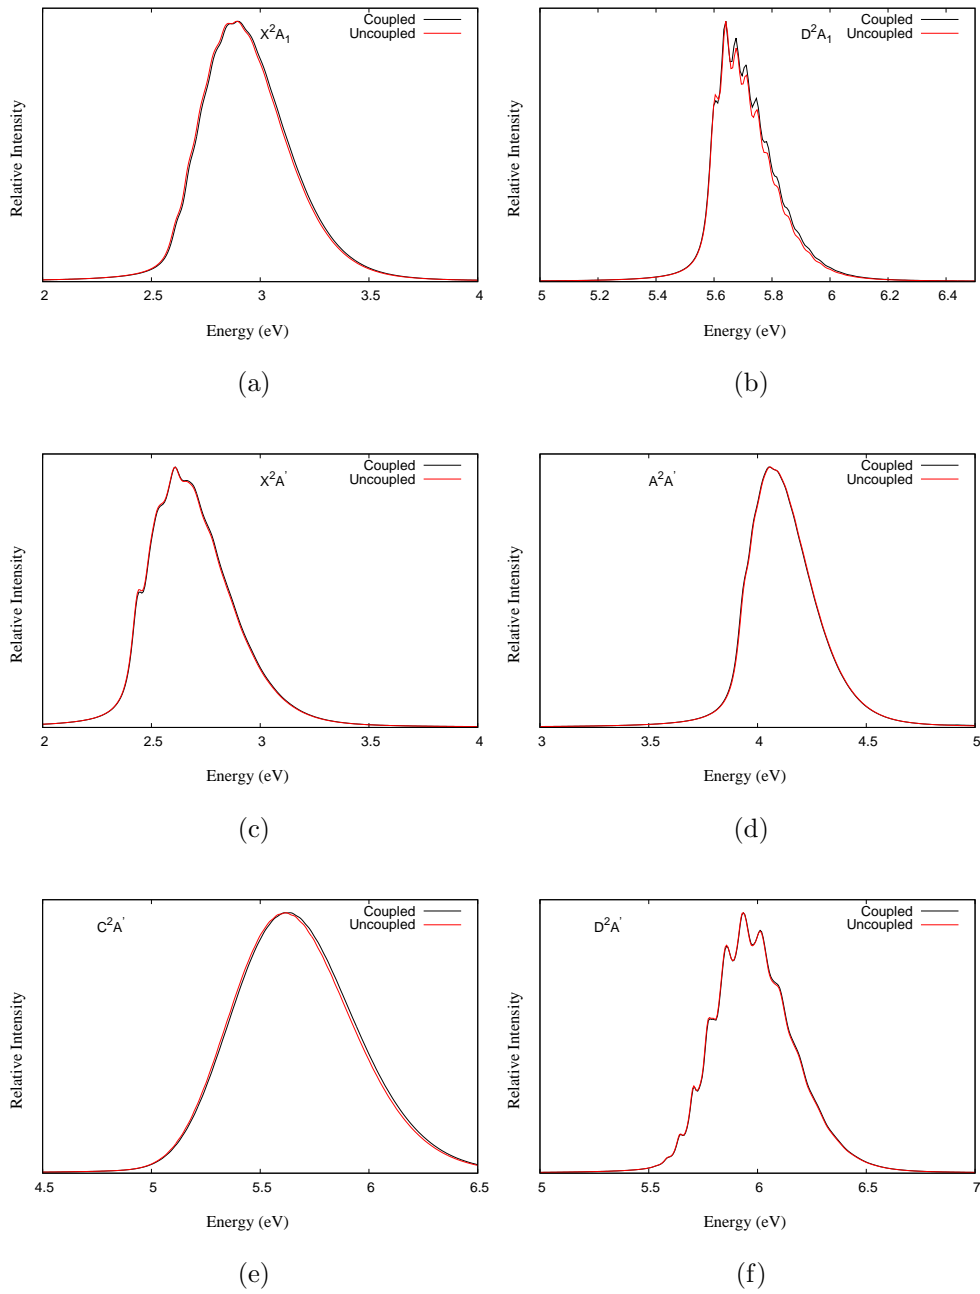

FIG. S5: The comparison between the coupled and uncoupled spectrum obtained from time-dependent calculations of  $\tilde{X}$  and  $\tilde{D}$  states of isomer-I are shown in panel a and b, while the same of  $\tilde{X}$ ,  $\tilde{A}$ ,  $\tilde{C}$  and  $\tilde{D}$  states of isomer-II are shown in panels c, d, e and f, respectively.



- 
- [1] B. B. Averkiev, D. Y. Zubarev, L. -M. Wang, W. Huang, L. S. Wang and A. I. Boldyrev, *J. Am. Chem. Soc.*, 2008, **130**, 9248–9250.
- [2] G. A. Worth, M. H. Beck, A. Jäckle and H. -D. Meyer, The mctdh package, Version 8.4, 2017, University of Heidelberg, Germany. See: <http://mctdh.uni-hd.de>.
